# Supplementary material
Source: PubMed Central journal article supplement (PMC2887993)
Supplement: tjp0588-1763-SD1.pdf [file tjp0588-1763-SD1.pdf]

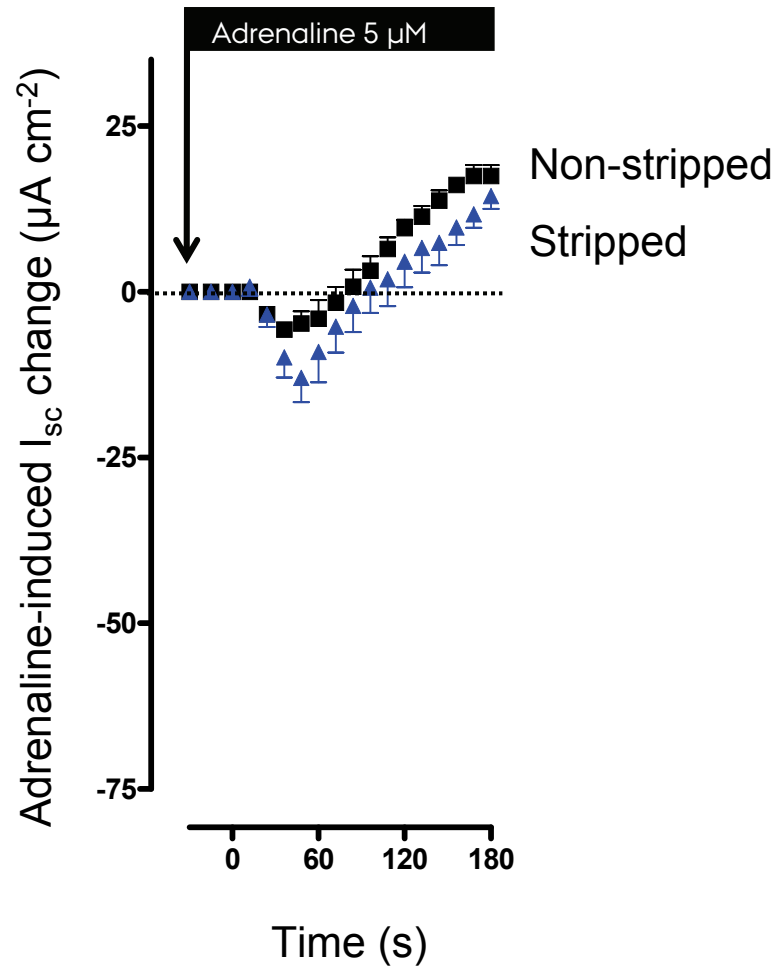

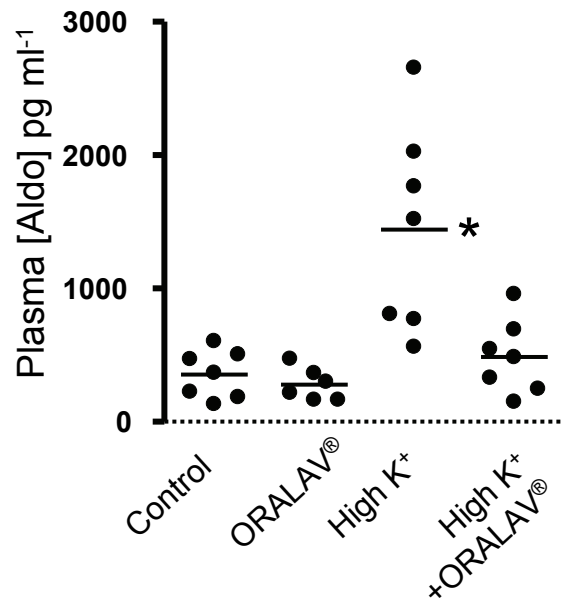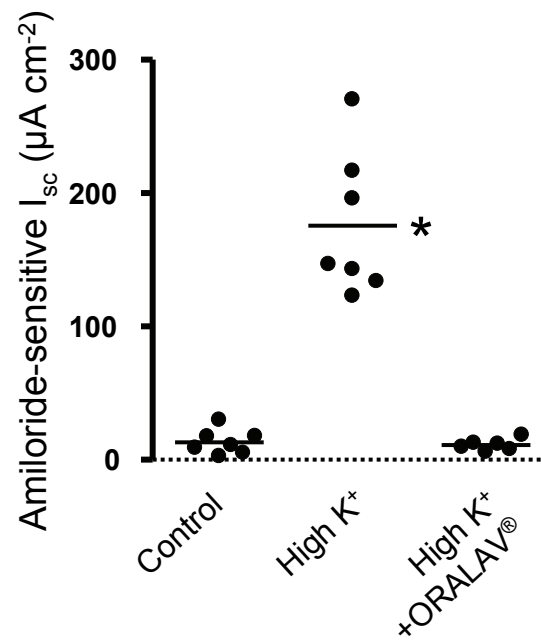

Legends for Supplementary Figures:

Supplementary Fig. 1: Summary of adrenaline-induced changes of short circuit current in tissues with intact mucosal muscular layer (NMRI mice). (■ closed black squares) and in tissues with mucosal muscular layers mechanical removed (▲ closed blue triangles). No significant differences are apparent (n=5).

Supplementary Fig. 2: Plasma aldosterone levels and amiloride-sensitive  $I_{sc}$  values in NMRI mice treated on control diet, control diet with ORALAV<sup>®</sup> (only aldo), high  $K^+$  diet and high  $K^+$  diet with ORALAV<sup>®</sup> in the drinking water (see Methods for details). Note that in animals on a high  $K^+$  diet with ORALAV<sup>®</sup> both, the plasma aldosterone and the indirect measure of functional aldosterone (amiloride-sensitive  $I_{sc}$ ) were suppressed with ORALAV<sup>®</sup>. \* indicates statistical significance between high  $K^+$  conditions and all other groups.

| <b>Gene name</b>                | <b>Sequence</b>                    | <b>Used concentration (nM)</b> |
|---------------------------------|------------------------------------|--------------------------------|
| <b>KCNMA</b>                    |                                    |                                |
| Forward primer 5'–3'            | CTCCAATGAAATGTACACAGAATATCT        | 300                            |
| Reverse primer 3'–5'            | CTATCATCAGGAGCTTAAGCTTCACA         | 300                            |
| Probe                           | CCTTCGTGGGTCTGTCCTTCCCTACTGTT      | 200                            |
|                                 |                                    |                                |
| <b>STREX</b>                    |                                    |                                |
| Forward primer 5'–3'            | GCCAAAGAAGTTAAAAGGGCATT            | 500                            |
| Reverse primer 3'–5'            | TGGCGGCTGCTCATCTTCAA               | 100                            |
| Probe                           | CTGCTCGTGCATGTCAGGCCGT             | 200                            |
|                                 |                                    |                                |
| <b>ZERO</b>                     |                                    |                                |
| Forward primer 5'–3'            | GCCAAAGAAGTTAAAAGGGCATT            | 500                            |
| Reverse primer 3'–5'            | TGTTGGGCGAGTTCCTCATG               | 300                            |
| Probe                           | TGGCTGCAGGCGGCTTGAAGATGAGCAGC<br>C | 200                            |
|                                 |                                    |                                |
| <b>CHIF</b>                     |                                    |                                |
| Forward primer 5'–3'            | TGACCCAGTTGATAAAGACAGTCC           | 300                            |
| Reverse primer 3'–5'            | CATTTGCACTTGCCACTCAGG              | 300                            |
| Probe                           | TTCCAGCGATGCACAGGAGCCCTC           | 200                            |
|                                 |                                    |                                |
| <b><math>\beta</math>-actin</b> |                                    |                                |
| Forward primer 5'–3'            | TTTGCAGCTCCTTCGTTGCC               | 100                            |
| Reverse primer 3'–5'            | CACGATGGAGGGGAATACAGC              | 500                            |
| Probe                           | TCCACACCCGCCACCAGTTCGCC            | 300                            |
|                                 |                                    |                                |
| <b>HPRT</b>                     |                                    |                                |
| Forward primer 5'–3'            | CTTCCTCCTCAGACCGCTTTT              | 300                            |
| Reverse primer 3'–5'            | TCTAGGTCATAACCTGGTTCATCA           | 300                            |
| Probe                           | CGCTAATCACGACGCTGGGACTGC           | 300                            |

Suppl. tab. 1: Primer and probe sequences and concentrations for qPCR.

| Mouse                                      | n  | Resting conditions |                                          |                                         | 2-3 min after adrenaline (5 $\mu$ M bl) |                                          |                                         |
|--------------------------------------------|----|--------------------|------------------------------------------|-----------------------------------------|-----------------------------------------|------------------------------------------|-----------------------------------------|
|                                            |    | $V_{te}$<br>(mV)   | $R_{te}$<br>( $\Omega$ cm <sup>2</sup> ) | $I_{sc}$<br>( $\mu$ A/cm <sup>2</sup> ) | $V_{te}$<br>(mV)                        | $R_{te}$<br>( $\Omega$ cm <sup>2</sup> ) | $I_{sc}$<br>( $\mu$ A/cm <sup>2</sup> ) |
| <b>BK<sup>+/+</sup></b>                    | 8  | -1.1 $\pm$ 0.1     | 55.3 $\pm$ 5.3                           | -22.2 $\pm$ 3.4                         | -2.3 $\pm$ 0.3                          | 45.0 $\pm$ 4.0                           | -52.0 $\pm$ 8.0                         |
| <b>BK<sup>-/-</sup></b>                    | 6  | -2.3 $\pm$ 0.5     | 61.1 $\pm$ 7.4                           | -42.1 $\pm$ 12.8                        | -4.2 $\pm$ 0.7                          | 55.8 $\pm$ 7.1                           | -79.9 $\pm$ 15.1                        |
| <b>CFTR<sup>+/+</sup></b>                  | 10 | -1.5 $\pm$ 0.3     | 52.0 $\pm$ 6.3                           | -31.1 $\pm$ 5.1                         | -2.8 $\pm$ 0.3                          | 43.8 $\pm$ 5.2                           | -59.0 $\pm$ 6.4                         |
| <b>CFTR<sup>-/-</sup></b>                  | 11 | 0.4 $\pm$ 0.2      | 50.1 $\pm$ 7.0                           | 8.0 $\pm$ 4.8                           | 0.9 $\pm$ 0.2                           | 47.0 $\pm$ 6.7                           | 19.6 $\pm$ 5.5                          |
| <b>BK<sup>+/+</sup> High K<sup>+</sup></b> | 8  | 0.6 $\pm$ 0.2      | 57.2 $\pm$ 4.7                           | 11.1 $\pm$ 3.9                          | -0.7 $\pm$ 0.4                          | 43.5 $\pm$ 4.8                           | -18.5 $\pm$ 13.3                        |
| <b>BK<sup>-/-</sup> High K<sup>+</sup></b> | 8  | -2.7 $\pm$ 1.0     | 56.2 $\pm$ 2.9                           | -50.4 $\pm$ 17.8                        | -5.4 $\pm$ 1.0                          | 50.1 $\pm$ 3.5                           | -108.5 $\pm$ 26.7                       |

Suppl. tab. 2: Basic electrical parameters measured in Ussing chamber in respective mouse colonic mucosa.
